1 **FASTQuick: Rapid and comprehensive quality assessment of raw sequence reads**

2

3 Fan Zhang<sup>1,\*</sup> and Hyun Min Kang<sup>2</sup>

4

5 <sup>1</sup>Department of Computational Medicine and Bioinformatics, University of Michigan Medical  
6 School, Ann Arbor, MI 48109, USA

7 <sup>2</sup>Department of Biostatistics, University of Michigan School of Public Health, Ann Arbor, MI  
8 48109, USA

9 \*To whom correspondence should be addressed.

10

11 **Corresponding Author:**

12 Fan Zhang,

13 Department of Computational Medicine and Bioinformatics,

14 University of Michigan Medical School,

15 100 Washington Ave, Ann Arbor, MI 48109-2218

16 E-mail: [fanzhang@umich.edu](mailto:fanzhang@umich.edu)

17

18

19

20

21

22

23

24

25

26

27

## 28 Abstract

29 **Background:** Rapid and thorough quality assessment of sequenced genomes in an ultra-high-  
30 throughput scale is crucial for successful large-scale genomic studies. Comprehensive quality  
31 assessment typically requires full genome alignment, which costs a significant amount of  
32 computational resources and turnaround time. Existing tools are either computational expensive  
33 due to full alignment or lacking essential quality metrics by skipping read alignment.

34 **Findings:** We developed a set of rapid and accurate methods to produce comprehensive quality  
35 metrics directly from raw sequence reads without full genome alignment. Our methods offer  
36 orders of magnitude faster turnaround time than existing full alignment-based methods while  
37 providing comprehensive and sophisticated quality metrics, including estimates of genetic  
38 ancestry and contamination.

39 **Conclusions:** By rapidly and comprehensively performing the quality assessment, our tool will  
40 help investigators detect potential issues in ultra-high-throughput sequence reads in real-time  
41 within a low computational cost, ensuring high-quality downstream analysis and preventing  
42 unexpected loss in time, money, and invaluable specimens.

### 43 **Keywords:**

44 Quality Assessment; Genetic Ancestry; Contamination; Sequencing Data Analysis

45

46

47

## 48 Findings

### 49 Introduction

50 Efficient and thorough quality assessment from deeply sequenced genomes in an ultra-  
51 high-throughput scale is crucial for successful large-scale sequencing studies. Delay or failure in  
52 detecting contamination, sample swaps, quality degradation, or other unexpected problems in the  
53 sequencing or library preparation protocol can result in enormous loss of time, money, and  
54 invaluable specimens if, for example, hundreds or thousands of samples are found to be  
55 contaminated weeks or months later. Ensuring comprehensive quality control of sequence data at  
56 real-time speed will assure generation of high-quality sequence reads, and subsequently  
57 successful outcomes in the downstream analyses.

58 Existing quality assessment or quality control (QC) tools mainly fall into two categories –  
59 pre-alignment and post-alignment methods – based on whether they require full alignment of the  
60 genome prior to the quality assessment. Pre-alignment methods, such as *FASTQC*[1], *PIQA*[2],  
61 and *HTQC*[3], produce read-level summary statistics that can be obtained from sequence reads,  
62 such as base compositions, k-mer distributions, base qualities, and GC bias levels. However,  
63 these pre-alignment methods do not estimate many key quality metrics required for  
64 comprehensive quality assessment. These missing metrics include mapping rate, depth  
65 distribution, fraction of genome covered, sample contamination, or genetic ancestry information.  
66 Other post-alignment methods, such as *QPLOT*[4], *Picard*[5], *GotCloud*[6], and *verifyBamID*[7],  
67 provide a subset of these key quality metrics but require full alignment of sequence reads, which  
68 typically takes hundreds of CPU hours for deep (e.g., >30x) sequence genome. (Table 1)

69 We describe *FASTQuick*, a rapid and accurate set of algorithms and software tools, to  
70 combine the merits of QC tools from both categories. By focusing on a variant-centric subset of

71 a reference genome(reduced reference genome), our methods offer up to 30~100-fold faster  
72 turnaround time than existing post-alignment methods for deeply sequenced genome, while  
73 providing a comprehensive set of quality metrics comparable with *QPLOT* and *verifyBamID*  
74 (full-alignment based results from these two tools together constitute most of the important QC  
75 metrics from *GotCloud*-based QC pipeline which we will compare against frequently later) with  
76 the help of statistical adjustments to account for the reduced reference genome.  
77

**Table 1.** Quality assessment metrics provided by different QC tools

| Metrics                     | <i>FASTQC</i> | <i>PIQA</i> | <i>HTQC</i> | <i>QPLOT</i> | <i>Picard</i> | <i>verifyBamID2</i> | <i>FASTQuick</i> |
|-----------------------------|---------------|-------------|-------------|--------------|---------------|---------------------|------------------|
| Base Quality Per Cycle      | ✓             | ✓           | ✓           | ✓            | ✓             |                     | ✓                |
| GC Bias                     |               |             |             | ✓            | ✓             |                     | ✓                |
| PCR Duplication Rate        |               |             |             | ✓            | ✓             |                     | ✓*               |
| Insert Size Distribution    |               |             |             | ✓            | ✓             |                     | ✓                |
| Contamination Estimate      |               |             |             |              | ✓             | ✓                   | ✓                |
| Genetic Ancestry            |               |             |             |              |               | ✓                   | ✓                |
| % Mapped Reads              |               |             |             | ✓            | ✓             |                     | ✓**              |
| Depth Distribution          |               |             |             | ✓            | ✓             |                     | ✓                |
| Total Number of Reads       | ✓             |             |             | ✓            | ✓             |                     | ✓                |
| Read Length Distribution    | ✓             |             | ✓           | ✓            | ✓             |                     | ✓                |
| Full-Alignment not Required | ✓             | ✓           | ✓           |              |               |                     | ✓                |

\*The functionality of PCR Duplication Rate estimation is in testing and will be released soon.

\*\*Currently only recommended for whole genome sequencing dataset.

78  
79 Computational Efficiency  
80 The primary goal of *FASTQuick* is to achieve comprehensive QC with much less  
81 computational cost than full-alignment-based QC procedures. A large fraction of the  
82 computational gains come from the usage of the reduced reference genome and filtering of

83 unalignable reads through mismatch-tolerant spaced k-mer hashing(Figure 1A)[8]. Compared to  
84 alignment to the full human reference genome, aligning a 3x HG00553 genome on the reduced  
85 reference genome reduced the run time by 34.9-fold (94,020 vs. 2,697 seconds) using the same  
86 algorithm. Using hash table built from mismatch-tolerant spaced k-mers, more than 90% of  
87 unalignable reads can be filtered out with very few loss (Table S1) of alignable reads, when 3 or  
88 more hits are required (default parameter) for a read to be considered as alignable, saving  
89 additional 65% of computational time (Figure 1B). Putting them together, the alignment step of  
90 *FASTQuick* (with default parameters) was 100-fold faster (94,020 vs. 939 seconds) than the full  
91 genome alignment. We observed that >99% of unalignable reads could be filtered out with a  
92 more stringent threshold (7 or more hits) at the expense of 0.01% loss of alignable reads.  
93 However, the additional computational gain was only 14% (939 vs. 811 seconds).

94 We also evaluated the overall computational efficiency between *FASTQuick* and the  
95 *GotCloud*-based QC pipeline (typical sequence processing pipeline based on full genome  
96 alignment as in 1000 genome project and TOPMed project) on the high-coverage genome (38x)  
97 and low-coverage (3x) genomes from the 1000 Genomes Project (Table 2). The results  
98 demonstrate that *FASTQuick* produces a comparable set of QC metrics to *GotCloud* with a  
99 30~100-fold faster turnaround time.

Table 2. Running time comparison (in hours)

| # of Thread | <i>FASTQuick</i> Time |              | <i>GotCloud</i> QC Time (with <i>BWA</i> ) |              |
|-------------|-----------------------|--------------|--------------------------------------------|--------------|
|             | HG00553(3X)           | NA12878(38X) | HG00553(3X)                                | NA12878(38X) |
| 1           | 1.03h                 | 5.48h        | 30.95h                                     | 369.56h      |
| 2           | 0.53h                 | 2.46h        | 21.53h                                     | 230.85h      |
| 4           | 0.33h                 | 1.76h        | 15.83h                                     | 154.91h      |
| 8           | 0.24h                 | 1.75h        | 12.74h                                     | 131.85h      |

Running time is evaluated as wall-clock elapsed time on a machine with Intel(R) Xeon(R) CPU (X7560 @ 2.27GHz). Reference indexing time is independent of the input sequence dataset and not included. (It takes 3min20s to index human genome under default settings.)

## 101 QC Metrics Produced by *FASTQuick*

102 *FASTQuick* can automatically generate and visualize the QC metrics listed in Table S2.  
103 Briefly, *FASTQuick* generates three types of generic QC summary statistics – per-base, per-read,  
104 and per-variant summary statistics. Per-base summary statistics inform mapping rate, depth  
105 distribution, GC-bias, and base quality. Per-read summary statistics allow us to estimate insert  
106 size distribution adjusted to account for pair-end alignment bias due to the reduced reference  
107 genome. Per-variant summary statistics allow us to estimate DNA contamination rate and genetic  
108 ancestry. These summary statistics are combined, jointly analyzed, and visualized into an  
109 interpretable and user-friendly quality report shown as in Item S1 and Item S2.

110

## 111 Accuracy of QC Metrics

112 We compared the distribution of QC metrics generated from *FASTQuick* with those from  
113 *GotCloud* on multiple sequenced genomes. The QC metrics shared between *FASTQuick* and  
114 *GotCloud* are listed in Table S2. The visualization QC metrics such as base quality recalibration  
115 (Figure 1E), normalized mean depth by GC content (Figure 1F), and depth distribution are very  
116 close between *FASTQuick* and *GotCloud*. For example, the two-sample Kolmogorov-Smirnov  
117 (KS) test statistics, which quantifies the maximum differences between two empirical cumulative  
118 distributions of depth was  $D = 0.040$ . Similarly, the Wasserstein-1D Distance, which quantifies  
119 the average distance between two cumulative distributions of depth, was  $W = 0.0038$ . The  
120 Wasserstein distance is a widely used metric to evaluate the similarity between two distributions  
121 in Generalized Adversary Network[9]. Even though such differences are statistically significant  
122 (mainly because of the very large number of observations), it is arguably a small amount  
123 difference typically observed between different QC tools on the same sequence data.

124           One challenge in quality assessment based on the partial alignment of sequence reads to  
125 the reduced reference genome is the estimation of insert size distribution. To systematically  
126 correct for biased estimation of insert sizes, we statistically integrated the observed insert sizes  
127 across all contigs inverse probability weighting based on the Kaplan-Meier curve[10] (See  
128 Methods). Applying our correction produces estimated insert size distribution much closer to that  
129 from the full alignment (Figure 1G). The KS-test statistic and the Wasserstein-1D distance were  
130  $D = 0.60$  and  $W = 0.0591$  when using 500bp contigs only, but they reduced to  $D = 0.18$  and  $W =$   
131  $0.0170$  when using both 500bp and 2,000bp contigs when comparing the insert size distributions  
132 between *FASTQuick* and *GotCloud*. When adjusting the insert-size distribution using a Kaplan-  
133 Meier estimator, they substantially reduced to  $D = 0.017$  and  $W = 0.0066$ .

134           To evaluate the estimation accuracy of contamination rate and genetic ancestry, we  
135 prepared artificially contaminated 1000 Genomes samples *in-silico* (see Methods). Then we  
136 compare the estimated contamination rate and genetic ancestry from *FASTQuick* with the  
137 estimation from the full-alignment QC pipeline-based result. Our results demonstrate that  
138 *FASTQuick* can estimate contamination rate (Figure 1H) and genetic ancestry (Table S3) as  
139 accurate as the standard method *VerifyBamID2* relying on the full-alignment result.

140

141

142

143

144

145

146

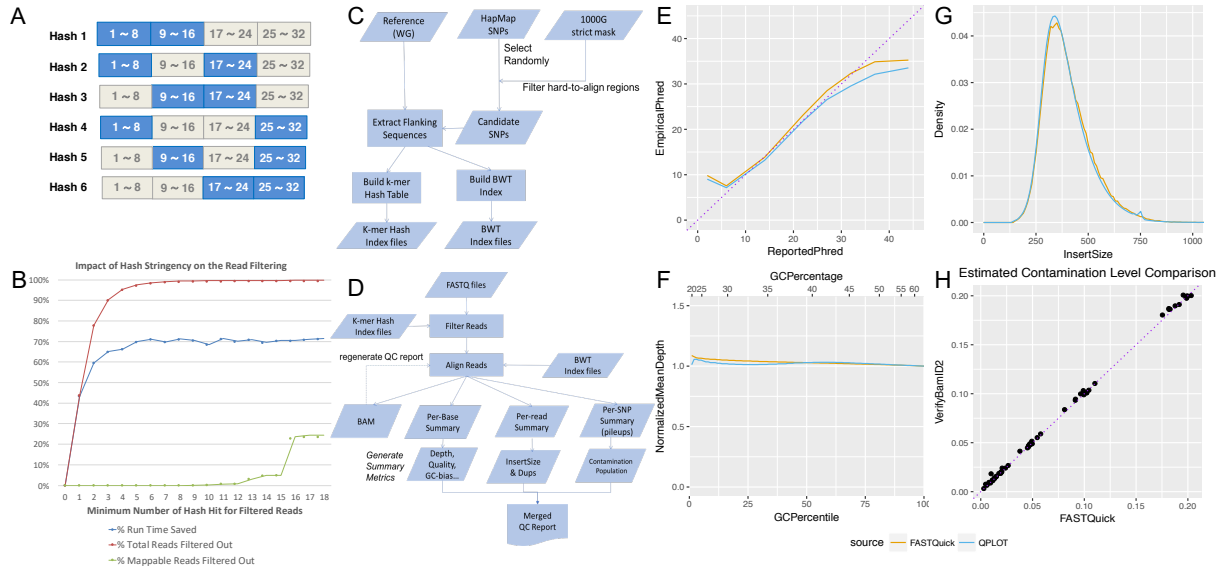

147

148 **Figure 1 Illustration of FASTQuick.** A) Spaced k-mer hash filter design with the tolerance of mismatches for each 32-mer. B)

149 Effect of minimum spaced k-mer hits to be considered for *BWA* alignment on the overall runtime, fraction of total reads filtered,

150 and fraction of falsely filtered alignable reads. *k* = 3 was used in our experiment. C) Procedure to build *FASTQuick* indices with a

151 reduced reference genome for spaced k-mer hash and the *BWA* algorithm. D) Procedure to process sequence reads and produce

152 QC metrics using *FASTQuick*. E) Comparison of visualizations of reported base qualities (in Phred scale) and empirical base

153 qualities between *QPLOT* and *FASTQuick* for a 38x genome. F) Comparison of visualization of GC bias (in normalized mean

154 depth) between *QPLOT* and *FASTQuick* for a 38x genome. G) Comparison of estimated insert size distributions between *QPLOT*

155 and *FASTQuick* (after Kaplan-Meier adjustment) for a 38x genome. H) Comparison of estimated contamination rates in an *in-*

156 *silico* contaminated 1000G samples between *verifyBamID2* and *QPLOT*. Purple diagonal dot line is  $y=x$ .

157

## 158 Methods

### 159 Overview of *FASTQuick*

160 *FASTQuick* first constructs a reduced reference genome from a set of flanking sequences

161 surrounding known SNPs and build a BWT index[11] and mismatch tolerant k-mer hash

162 table(Figure 1C). Once the indices are built, *FASTQuick* rapidly filters out unalignable reads

163 whose first 96-bp have less than 3 hits (out of 18 potential hits, among which 6 hits per 32-mer)



164 against the spaced k-mer hash indices, and align filtered sequence reads to the reduced reference  
165 genome using the BWT index (Figure 1D). The small fraction of filtered aligned reads will be  
166 stored in binary Sequence Alignment/Map format (BAM) [12]. Next, all the summary statistics  
167 that are generated from the aligned reads are collected and jointly analyzed to form various QC  
168 metrics that are reported in a user-friendly report in HTML (Item S1).

169

170 Construction of Reduced Reference Genome using Flanking Sequences of SNPs

171 *FASTQuick* constructs a reduced reference genome based on well-alignable flanking  
172 sequences around known common SNPs to enrich the reads that are informative both for genetic  
173 inference (e.g., contamination and ancestry) and other genomic quality metrics that require reads  
174 alignment. Starting from an arbitrary set of known SNPs, *FASTQuick* randomly selects a  
175 designated number of SNPs from known common (MAF>5%) SNP set, such as HapMap3[13],  
176 while excluding SNPs near hard-to-align regions (e.g., 1000 genome project strict mask region).  
177 *FASTQuick* then constructs reduced reference genome using short flanking sequences of the  
178 majority of SNPs (e.g., 90%) and long flanking sequences of the remained SNPs.

179

180 Filtering Unalignable Reads with Mismatch-tolerant Hash

181 Because the reduced reference genome is a small subset of the whole genome sequence,  
182 we expect that only a small fraction of reads will be alignable. However, attempting to align all  
183 the reads is still computationally expensive. *FASTQuick* builds a hash-based index to rapidly  
184 filter out the reads that are unlikely to be aligned to the reduced reference genome. To make the  
185 hash robust against sequencing errors, *FASTQuick* builds six locally sensitive hash tables of 16-

186 mers for each 32-mer (Figure 1A), so that 32-mers with 2 or fewer mismatches can still be  
187 guaranteed to match to at least one of the hash tables[8].

188 *FASTQuick* partitions each sequence read into multiple 32-mers and performs hash  
189 lookups for each possible 16-mers. For example, for a 100-bp read, eighteen 16-mers (6 per 32-  
190 mer) across three 32-mer will be matched to the hash table. For reads longer than 96-bp reads,  
191 only the first 96-bp reads are used. *FASTQuick* will decide to filter out a read or not based on  
192 whether the number of matching 16-mers is less than a certain threshold  $k$ . For example, if  $k$  is 3,  
193 reads with less than 7 mismatches are guaranteed to pass the filter, and many other reads with  
194 more mismatches will pass the filter. If  $k$  is 10, reads with less than 3 mismatches are guaranteed  
195 to pass the filter. We chose  $k=3$  based on our experiment based on empirical observations (see  
196 Findings).The remained reads will then be aligned by the optimized BWA-like algorithms to the  
197 reduced reference genome.

198

#### 199 Generating Base-level, Read-level, and Variant-Level QC Metrics

200 Using the reads aligned to the reduced reference genome, *FASTQuick* generates a full list  
201 of base-level, read-level, and variant-level QC metrics (Table S2). Base-level metrics, such as  
202 base quality, and sequencing cycle, are recorded directly without using the alignment  
203 information. Because the reads spanning the end of flanking sequences may be poorly aligned,  
204 *FASTQuick* produces metrics only on the fully alignable portion of flanking sequences. Let the  
205 length of the flanking sequence be  $w$ , and the read length be  $r$ , then only  $2^{*(w-r)} + 1$  bases  
206 spanning the variant site will be considered when calculating base-level summary statistics.  
207 Read-level QC metrics, such as the fraction of mapped reads, insert size distribution are  
208 estimated and reported based on reads alignment result. Variant-level metrics are collected after

209 alignment result become available and are reported as pile-up bases, estimation of contamination  
210 level, and genetic ancestry.

211

## 212 Bias-Corrected Estimation of Insert Size Distribution

213 The insert size distribution is typically estimated from distances between the aligned pairs  
214 of reads from the fully aligned reads. When using a reduced reference, a large proportion of  
215 paired reads may not be fully mapped, and the read pairs that have shorter insert sizes are more  
216 likely to be mapped in both ends. As a result, estimating insert size distribution based only on the  
217 reads where both ends are mapped will result in biased estimates of insert sizes, as empirically  
218 demonstrated using the 38x genome in Figure S1.

219 We first attempted to resolve this challenge by extending 10% of the variant-centric  
220 contigs to be sufficiently long (2000bp), and by estimating insert size only from the reads  
221 mapped to longer contigs. This way, we prevent the reduced reference genome from becoming  
222 too large to achieve computational efficiency and keep the insert size estimation less biased at  
223 the same time. But due to the limited number of long-flanking variants, bias and fluctuations still  
224 exist in the estimated insert size distribution. (Figure S2)

225 To infer insert size distribution more accurately, *FASTQuick* further corrects for the bias  
226 nonparametrically using the Kaplan-Meier estimator. Due to the limited length of flanking  
227 sequences in the reduced reference, the observed distribution of insert sizes obtained from the  
228 reads that both ends are mapped will be biased towards smaller values. To recover the full  
229 distribution of insert sizes adjusting for the “censored” reads (i.e., reads with only one of the  
230 paired-ends aligned) enriched for large insert sizes, we adopted the Kaplan-Meier estimator as an  
231 inverse-probability-of-censoring weighted average[10] as described below.

232 Specifically, we define a tuple  $(t_o, t_l, t_r)$  (Figure S3) for each mapped DNA segment (or  
233 read pair), where  $t_o$  is the observed insert size,  $t_l$  is the maximal insert size of *read 1*, and  $t_r$  is  
234 the maximal insert size of *read 2*. The maximal insert size is defined as the distance between the  
235 leftmost/rightmost base of *read 1/read 2* and the rightmost/leftmost base of the flanking region  
236 sequence, respectively. This tuple is fully specified only when a read pair is properly aligned,  
237 otherwise, for single-end mapped read pair (including partially mapped pair) only one of the two  
238 maximal insert sizes ( $t_l$  or  $t_r$ ) is available and unobserved value is set to missing, the rest of the  
239 read pairs, such as read pairs that are mapped to different contigs, with low mapping quality, or  
240 in abnormal orientation, are discarded in the estimation of insert size distribution. Empirically,  
241 given  $N$  properly aligned read pairs (i.e., tuples without missing values), we can estimate insert  
242 size by counting the frequency of different observed insert sizes,  $t_o$ , and the cumulative  
243 distribution of insert size hence becomes:

$$244 \quad F(t) = \frac{1}{N} \sum_{i=1}^N I[t_{o,i} \leq t]$$

245 However, as mentioned above, this direct estimation will be severely biased because of  
246 reads mapped only in a single end is more likely to have larger insert sizes. To correct for this  
247 bias, we use an approach analogous to the estimation of survival function as  $S(t) = 1 - F(t)$ .  
248 We can view the leftmost/rightmost base on each flanking region as the start time point, the  
249 exact insert size  $t_o$  as the time when it fails to observe the data point, and the maximal insert  
250 size,  $t_l$  and  $t_r$ , as the time when the data point is censored. Let the ordered observed time points  
251  $t_o$  and censored time points  $t_l$  (or  $t_r$ ) be  $\tau$ . Denote  $o_t$  as the number of observed failure cases,  
252 i.e., the number of read pairs that have observed insert size less than or equal to  $t$ , and also  
253 denote  $c_t$  as the number of censored cases at time  $t$ , i.e., the number of single-end mapped read

254 pairs have maximal insert size less than or equal to  $t$ , then let  $I[\tau_j \geq t]$  be indicator function if  $j$ -  
255 th time point larger than certain time  $t$  ( $j$ -th insert size larger or equal to  $t$ ). Then the risk set is:

$$256 \quad Y(t) = \sum_{j=1}^J (o_j + c_j) I[\tau_j \geq t]$$

257 Then the Kaplan-Meier estimator  $\widehat{S}_{km}$  of  $S(t)$ :

$$258 \quad \widehat{S}_{km}(t) = \prod_{\{j|\tau_j \leq t\}} \left(1 - \frac{n_j}{Y(\tau_j)}\right)$$

259 Satten *et al.*[10] proposed a simplified algorithm to iteratively estimate survival function  
260 for failure times and survival functions for censoring times, by which we conveniently estimate  
261  $F(t)$ .

262

263 Estimation of Contamination Rates and Genetic Ancestry

264 We also implemented the likelihood-based methods to estimate genetic ancestry and  
265 contamination rate in *FASTQuick*. The details of these methods will be fully described in  
266 *VerifyBamID2*[14]. In *FASTQuick*, to seamlessly integrated these methods into our ultra-fast QC  
267 procedure, we designed compatible variant-centric data structures and input/output interfaces  
268 that can directly deliver sequence information and estimated statistics from *FASTQuick* to  
269 modules that estimate contamination and genetic ancestry.

270

271 Support for Target Sequencing Dataset

272 *FASTQuick* also has provided options to incorporate target regions. We can conveniently  
273 use the exome region list for Exome-seq, and abundantly expressed gene list for RNA-seq as  
274 input information to only select markers within the list. We prepared the result generated by

275 *FASTQuick* for exome sequencing data of HG00553 from the 1000 genome project as a  
276 demonstration (Item S2).

## 277 Discussion

278 We described *FASTQuick*, which addresses computational challenges in quality control  
279 of ultra-high-throughput sequence data, by focusing on sequence reads mappable to an  
280 informative subset of the reference genome. Our results demonstrate that *FASTQuick* achieves  
281 with on average 30 ~ 100-fold faster turnaround time than methods based on full sequence  
282 alignment while producing comprehensive and accurate QC metrics. Compared to previous  
283 quality assessment methods that do not align sequence reads at all, *FASTQuick* provides more  
284 comprehensive QC metrics such as depth distribution, insert size distribution, contamination, and  
285 genetic ancestry.

286 *FASTQuick* leverages several methods, such as spaced-kmer hash table and Kaplan-  
287 Meier estimator, to enable rapid and accurate estimation of QC metrics. Interestingly, the  
288 computational time is much faster than the time required to convert and compress Illumina's  
289 BCL formatted files into FASTQ files. Therefore, *FASTQuick* can work as a UNIX pipe during  
290 the conversion procedures to increase efficiency in the sequencing pipeline.

291 There are potential drawbacks of only using the reduced (subset of) reference genome,  
292 but *FASTQuick* applies heuristics to avoid such drawbacks. For example, reads that originate  
293 from multiple homologous regions on the genome may be misaligned to the same contig on the  
294 reduced genome, which may affect variant-level quality metrics. *FASTQuick* addresses this issue  
295 by strictly selecting regions that are unique and easy to align (callable regions), and we  
296 demonstrated the effectiveness by showing that contamination and genetic ancestry estimates are  
297 almost identical to the estimation from full genome alignment result. Another issue could be the

298 excessive single-end alignment, for example, it will skew the estimation of insert size  
299 distribution toward smaller value. We applied Kaplan-Meier estimator to correct the estimation  
300 as described above. There are still limitations associated with the reduced reference genome. For  
301 example, a precise estimation of % mapped reads is challenging, especially for targeted  
302 sequencing reads, due to the lack of repetitive sequences. Analysis involving structural variation  
303 or comprehensive screening of GWAS variants may not be feasible under *FASTQuick*'s settings.

304         Currently, *FASTQuick* is only suitable for short sequence reads. To enable an analysis of  
305 long sequence reads, additional alignment algorithms such as *Minimap2* [15] could be  
306 incorporated. Extending *FASTQuick* to other types of sequence data, such as RNA-seq, ChIP-  
307 seq, and ATAC-seq, should also be possible if the technology-specific characteristics are  
308 properly considered and accounted for. What's more, *FASTQuick* can serve as a general down-  
309 sampling step prior to analysis like sample-swap detection, kinship estimation with the help of  
310 alignment result on common variants. More broadly, although we demonstrated *FASTQuick*'s  
311 capability by using human genome analysis as an example, the whole pipeline is adaptable easily  
312 to other organisms provided with corresponding genomic databases.

313         Unlike hardware-accelerated solutions achieve fast speed by introducing specialized  
314 hardware, such as *DRAGEN*[16] and *Parabricks*[17], *FASTQuick* gains its speed from optimized  
315 algorithms that are specially designed for the reduced genome setting. Compared to omni-  
316 purpose proprietary tools like *DRAGEN* and *Parabricks*, *FASTQuick* is an open-source tool that  
317 does not require specific hardware such as GPU or FPGA devices and is specifically designed  
318 for quality assessment which can be critical to have rapid turnaround time in sequence analysis  
319 workflow and add a great value to the existing sequence analysis ecosystem.

320

321

322

## 323 Availability and requirements

324 **Project name:** [FASTQuick](#)

325 **Project home page:** <https://github.com/Griffan/FASTQuick>

326 **Operating system(s):** [Linux](#), [MacOS](#)

327 **Programming language:** [C++](#), [Shell](#), [R](#)

328 **Other requirements:** [CMAKE](#), [libhts](#), [ggplot2](#), [knitr](#)

329 **License:** [MIT](#)

330 **Any restrictions to use by non-academics:** [None](#)

## 331 Declarations

332 **Ethics approval and consent to participate:** Not applicable

333 **Consent for publication:** All the authors consent to publish.

334 **Availability of data and materials:** Datasets are publicly available at the Trans-Omics  
335 Precision Medicine (TOPMed) project and the 1000 genome project.

336 **Competing interests:** None

337 **Funding:** This work was supported by HL137182 (to H.M.K. and F.Z), HL117626 and  
338 MH105653 (to H.M.K).

339 **Authors' contributions:** F.Z contributed to the coding material and experiments. F.Z and  
340 H.M.K. together contributed to the writing material.

341

342



## 343 References

- 344 1. Andrews S, Babraham Bioinformatics. FastQC: A quality control tool for high  
345 throughput sequence data. <https://www.bioinformatics.babraham.ac.uk/projects/fastqc/>. 2010.
- 346 2. Martínez-Alcántara A, Ballesteros E, Feng C, Rojas M, Koshinsky H, Fofanov VY, et  
347 al. PIQA: Pipeline for Illumina G1 genome analyzer data quality assessment. *Bioinformatics*.  
348 2009;25:2438–9.
- 349 3. Yang X, Liu D, Liu F, Wu J, Zou J, Xiao X, et al. HTQC: A fast quality control toolkit  
350 for Illumina sequencing data. *BMC Bioinformatics*. 2013;14:33.
- 351 4. Li B, Zhan X, Wing MK, Anderson P, Kang HM, Abecasis GR. QPLOT: A quality  
352 assessment tool for next generation sequencing data. *BioMed Research International*. 2013;2013.
- 353 5. Broad Institute. Picard:A set of command line tools (in Java) for manipulating high-  
354 throughput sequencing (HTS) data and formats such as SAM/BAM/CRAM and VCF.  
355 <http://broadinstitute.github.io/picard/>. 2016.
- 356 6. Jun G, Wing MK, Abecasis GR, Kang HM. An efficient and scalable analysis  
357 framework for variant extraction and refinement from population-scale DNA sequence data.  
358 *Genome Research*. 2015;25:918–25.
- 359 7. Jun G, Flickinger M, Hetrick KN, Romm JM, Doheny KF, Abecasis GR, et al.  
360 Detecting and estimating contamination of human DNA samples in sequencing and array-based  
361 genotype data. *American Journal of Human Genetics*. 2012;91:839–48.
- 362 8. Li H, Ruan J, Durbin R. Mapping short DNA sequencing reads and calling variants  
363 using mapping quality scores. *Genome Research*. 2008;18:1851–8.
- 364 9. Arjovsky M, Chintala S, Bottou L. Wasserstein generative adversarial networks. 34th  
365 International Conference on Machine Learning, ICML 2017. 2017.

- 366           10. Satten GA, Datta S. The Kaplan-Meier estimator as an inverse-probability-of-  
367 censoring weighted average. *American Statistician*. 2001;55:207–10.
- 368           11. Li H, Durbin R. Fast and accurate short read alignment with Burrows-Wheeler  
369 transform. *Bioinformatics*. 2009;25:1754–60.
- 370           12. Li H, Handsaker B, Wysoker A, Fennell T, Ruan J, Homer N, et al. The Sequence  
371 Alignment/Map format and SAMtools. *Bioinformatics*. 2009;25:2078–9.
- 372           13. International HapMap 3 Consortium. Integrating common and rare genetic variation  
373 in diverse human populations. *Nature*. 2010;467:52–8.
- 374           14. Zhang F, Flickinger M, Taliun SAG, Abecasis GR, Scott LJ, McCarroll SA, et al.  
375 Ancestry-agnostic estimation of DNA sample contamination from sequence reads. *Genome*  
376 *Research*. 2020;30:185–94.
- 377           15. Li H. Minimap2: pairwise alignment for nucleotide sequences. *Bioinformatics*.  
378 2018;34:3094–100.

379

## 380 Web links and URLs

- 381           16. DRAGEN-BIO-IT-platform. [https://www.illumina.com/products/by-type/informatics-](https://www.illumina.com/products/by-type/informatics-products/dragen-bio-it-platform.html)  
382 [products/dragen-bio-it-platform.html](https://www.illumina.com/products/by-type/informatics-products/dragen-bio-it-platform.html) Accessed Feb. 21st, 2020.
- 383           17. Parabricks Genomic Analysis Pipelines. [https://www.parabricks.com/wp-](https://www.parabricks.com/wp-content/uploads/2019/10/Parabricks_Product_Sheet.pdf)  
384 [content/uploads/2019/10/Parabricks\\_Product\\_Sheet.pdf](https://www.parabricks.com/wp-content/uploads/2019/10/Parabricks_Product_Sheet.pdf) Accessed Feb. 21st, 2020.

385

386

387

388

389

## 390 [Supplementary Materials](#)

### 391 [Experimental Data](#)

392           We selected a deeply sequenced genome of a publicly available sample (NA12878) from  
393 the Trans-Omics Precision Medicine (TOPMed) project for most evaluations. Also, we selected  
394 an exome-sequencing dataset of the same sample (NA12878) from the 1000 genome project  
395 (SRR098401) for target sequencing evaluation. To evaluate computational efficiency for the  
396 low-pass sequence genome, we also evaluated another sample (HG00553) from the 1000  
397 Genomes Project (ERR013170, ERR015764, and ERR018525). To evaluate the accuracy of  
398 contamination estimates we constructed 10 genomes with *in-silico* contamination by randomly  
399 sampling aligned sequence reads from samples in 1000 Genomes phase 3 project and then  
400 mixing reads from different samples proportional to the intended contamination rates  $\alpha \in$   
401  $\{0.01, 0.02, 0.05, 0.1, 0.2\}$ , as described in *VerifyBamID2*[14].

402

403

404

405

406

407

408

409

## 410 Supplementary Tables

Table S1. Impact of Mismatch Threshold on Kmer-Hash based Reads Filtering

| Mismatch Threshold K | Total Reads | Filtered Reads      | Remained Mappable Reads |
|----------------------|-------------|---------------------|-------------------------|
| 0                    | 96240521    | 0 (0.0000%)         | 270405 (100.0000%)      |
| 1                    | 96240521    | 42200008 (43.8485%) | 270405 (100.0000%)      |
| 2                    | 96240521    | 74965846 (77.8943%) | 270405 (100.0000%)      |
| 3                    | 96240521    | 86900055 (90.2947%) | 270405 (100.0000%)      |
| 4                    | 96240521    | 91827374 (95.4145%) | 270403 (99.9993%)       |
| 5                    | 96240521    | 93920755 (97.5896%) | 270397 (99.9970%)       |
| 6                    | 96240521    | 94865507 (98.5713%) | 270381 (99.9911%)       |
| 7                    | 96240521    | 95392311 (99.1187%) | 270371 (99.9874%)       |
| 8                    | 96240521    | 95635568 (99.3714%) | 270197 (99.9231%)       |
| 9                    | 96240521    | 95756594 (99.4972%) | 270105 (99.8891%)       |
| 10                   | 96240521    | 95828932 (99.5723%) | 269643 (99.7182%)       |
| 11                   | 96240521    | 95872139 (99.6172%) | 268304 (99.2230%)       |
| 12                   | 96240521    | 95898966 (99.6451%) | 268160 (99.1698%)       |
| 13                   | 96240521    | 95941830 (99.6896%) | 261835 (96.8307%)       |
| 14                   | 96240521    | 95961621 (99.7102%) | 257046 (95.0596%)       |
| 15                   | 96240521    | 95969319 (99.7182%) | 256664 (94.9184%)       |
| 16                   | 96240521    | 96026258 (99.7774%) | 206014 (76.1872%)       |
| 17                   | 96240521    | 96031175 (99.7825%) | 204101 (75.4797%)       |
| 18                   | 96240521    | 96033063 (99.7844%) | 203998 (75.4417%)       |

Mismatch threshold (number of kmer hits) experiments to evaluate the kmer-hash based reads filtering effectiveness

**Table S2.** Summary statistics and visualization items produced by *FASTQuick*

| Output File Name                       | Visualization | Description                                         |
|----------------------------------------|---------------|-----------------------------------------------------|
| [output_prefix].AdjustedInsertSizeDist | Y             | Adjusted Insert Size Distribution                   |
| [output_prefix].DepthDist              | Y             | Depth distribution                                  |
| [output_prefix].EmpCycleDist           | Y             | Empirical Base Quality vs. Sequencing Cycle         |
| [output_prefix].EmpRepDist             | Y             | Empirical Base Quality vs. Reported Base Quality    |
| [output_prefix].GCDist                 | Y             | GC Content Distribution                             |
| [output_prefix].InsertSizeTable        | N             | Insert Size for Each Read Pair                      |
| [output_prefix].Likelihood             | N             | Genotype Likelihood                                 |
| [output_prefix].Pileup                 | N             | Pileup format information                           |
| [output_prefix].RawInsertSizeDist      | Y             | Insert Size Distribution (Unadjusted)               |
| [output_prefix].bam                    | N             | Reads Alignment                                     |
| [output_prefix].Summary                | N             | General Summary Report                              |
| [output_prefix].pdf                    | Y             | Visualization file containing various QC metrics    |
| FinalReport.html                       | Y             | Integrated report including statistics listed above |

412

413

414

415

416

417

418

419

420

421

422

Table S3. Comparison of Genetic Ancestry Estimation between *FASTQuick* and *VerifyBamID2*.

| Simulated_Sample | Tool                | PC1_mu  | PC1_sd | PC2_mu  | PC2_sd |
|------------------|---------------------|---------|--------|---------|--------|
| HG00097_HG00464  | <i>FASTQuick</i>    | -0.0102 | 0.0004 | -0.0235 | 0.0029 |
| HG00097_HG00464  | <i>VerifyBamID2</i> | -0.0104 | 0.0003 | -0.0234 | 0.0033 |
| HG00097_NA19204  | <i>FASTQuick</i>    | -0.0100 | 0.0001 | -0.0251 | 0.0001 |
| HG00097_NA19204  | <i>VerifyBamID2</i> | -0.0101 | 0.0001 | -0.0250 | 0.0002 |
| HG00105_HG00463  | <i>FASTQuick</i>    | -0.0101 | 0.0002 | -0.0259 | 0.0017 |
| HG00105_HG00463  | <i>VerifyBamID2</i> | -0.0104 | 0.0004 | -0.0247 | 0.0027 |
| HG00105_NA19152  | <i>FASTQuick</i>    | -0.0096 | 0.0004 | -0.0265 | 0.0003 |
| HG00105_NA19152  | <i>VerifyBamID2</i> | -0.0097 | 0.0003 | -0.0267 | 0.0004 |
| HG00692_HG00107  | <i>FASTQuick</i>    | -0.0167 | 0.0004 | 0.0299  | 0.0023 |
| HG00692_HG00107  | <i>VerifyBamID2</i> | -0.0169 | 0.0005 | 0.0306  | 0.0022 |
| HG00692_NA19204  | <i>FASTQuick</i>    | -0.0165 | 0.0005 | 0.0306  | 0.0014 |
| HG00692_NA19204  | <i>VerifyBamID2</i> | -0.0166 | 0.0004 | 0.0306  | 0.0014 |
| HG00708_HG00101  | <i>FASTQuick</i>    | -0.0165 | 0.0002 | 0.0312  | 0.0005 |
| HG00708_HG00101  | <i>VerifyBamID2</i> | -0.0165 | 0.0002 | 0.0312  | 0.0004 |
| HG00708_NA19152  | <i>FASTQuick</i>    | -0.0161 | 0.0004 | 0.0314  | 0.0003 |
| HG00708_NA19152  | <i>VerifyBamID2</i> | -0.0166 | 0.0000 | 0.0312  | 0.0002 |
| NA19141_HG00107  | <i>FASTQuick</i>    | 0.0355  | 0.0005 | 0.0042  | 0.0002 |
| NA19141_HG00107  | <i>VerifyBamID2</i> | 0.0354  | 0.0005 | 0.0042  | 0.0002 |
| NA19141_HG00464  | <i>FASTQuick</i>    | 0.0353  | 0.0005 | 0.0038  | 0.0008 |
| NA19141_HG00464  | <i>VerifyBamID2</i> | 0.0355  | 0.0004 | 0.0039  | 0.0009 |
| NA19190_HG00101  | <i>FASTQuick</i>    | 0.0338  | 0.0000 | 0.0038  | 0.0002 |
| NA19190_HG00101  | <i>VerifyBamID2</i> | 0.0339  | 0.0004 | 0.0042  | 0.0007 |
| NA19190_HG00463  | <i>FASTQuick</i>    | 0.0341  | 0.0004 | 0.0045  | 0.0005 |
| NA19190_HG00463  | <i>VerifyBamID2</i> | 0.0340  | 0.0002 | 0.0040  | 0.0002 |

Comparison of genetic ancestry estimation (via principal component coordinates) between *FASTQuick* and *VerifyBamID2* using 60(12 pairs of datasets with 5 different mixing rate 0.01, 0.02, 0.05, 0.1, 0.2) simulated low coverage sequencing samples from 1000 genome project. *FASTQuick* or *VerifyBamID2* independently estimates the set of PC coordinates of each simulated sample.

423

424

425

426

427

428

429

430 Supplementary Figures

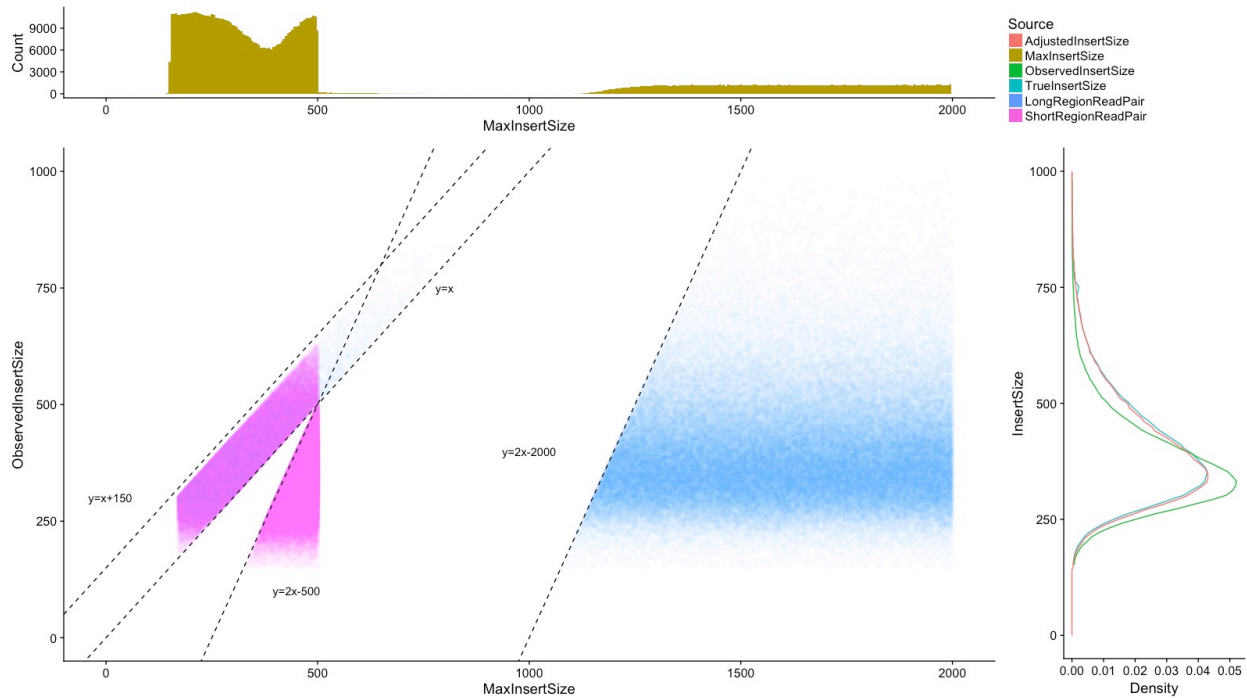

431  
432 **Figure S1 Marginal distribution of max insert size and observed insert size in the reduced genome under 250bp(short)**  
433 **and 1000bp(long) flanking length configuration.** Top) Marginal distribution of max insert size. Right) Marginal distribution of  
434 observed insert size(green), along with true insert size distribution (Blue) and adjusted insert size distribution(red) Bottom)  
435 Scatter plot of read pairs with max insert size and observed insert size being coordinates. Blue dots represent read pairs mapped  
436 to the long flanking region; purple dots represent read pairs mapped to the short flanking region. The band between the line  
437 “ $y=x$ ” and line “ $y=x+150$ ” are read pairs partially mapped. The line “ $y=2x-500$ ” and line “ $y=2x-2000$ ” are the effective boundaries  
438 where read pairs have both ObservedInsertSize and MaxInsertSize for 250bp flanking region and 1000bp flanking region,  
439 respectively.

440

441

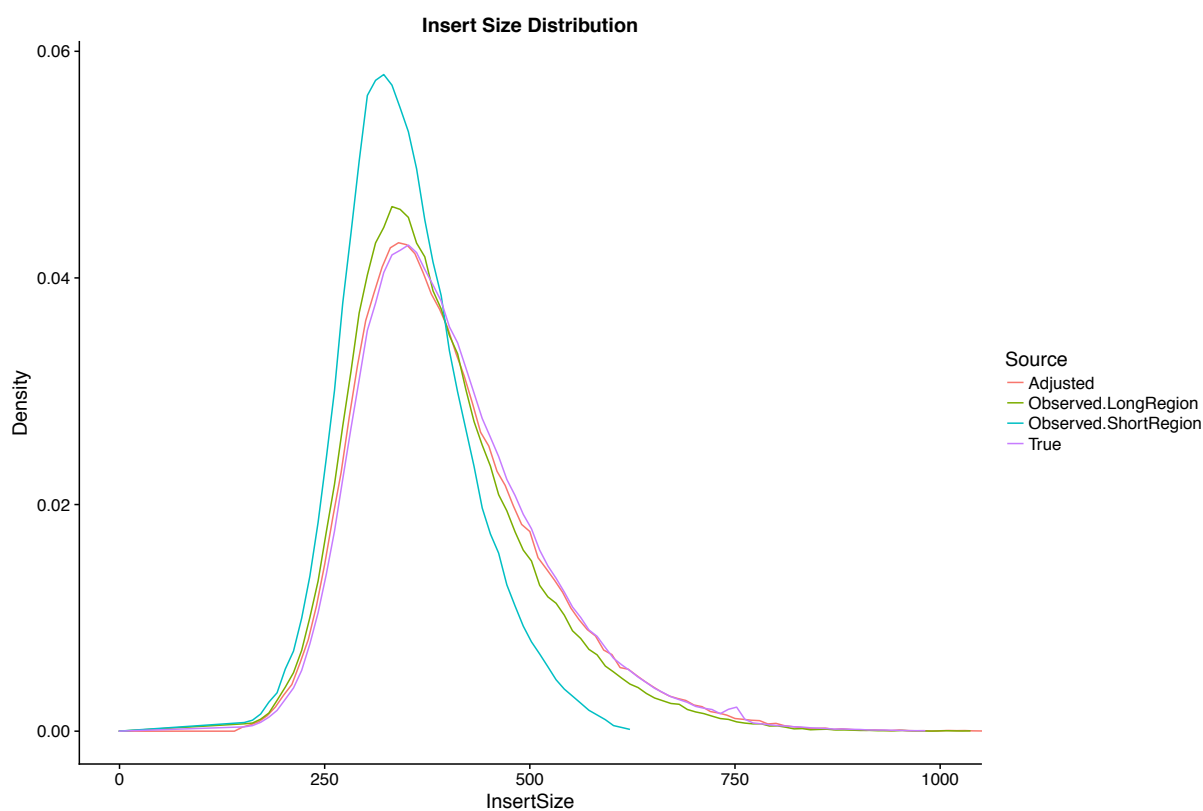

442 **Figure S2 Biased insert size distribution in reduced genome under 250bp(short) or 1000bp(long) flanking length**  
443 **configuration.** Each color represents one scenario of insert size estimation without correction. “Observed.LongRegion” (green)  
444 is when insert size distribution estimated only using reads mapped to the long flanking region; “Observed.ShortRegion”(blue) is  
445 when only using reads mapped to the short flanking region; “True” (purple) is insert size distribution estimated under full  
446 genome alignment; “Adjusted”(red) is insert size distribution estimated by *FASTQuick*.

447

448

449

450

451

452

453



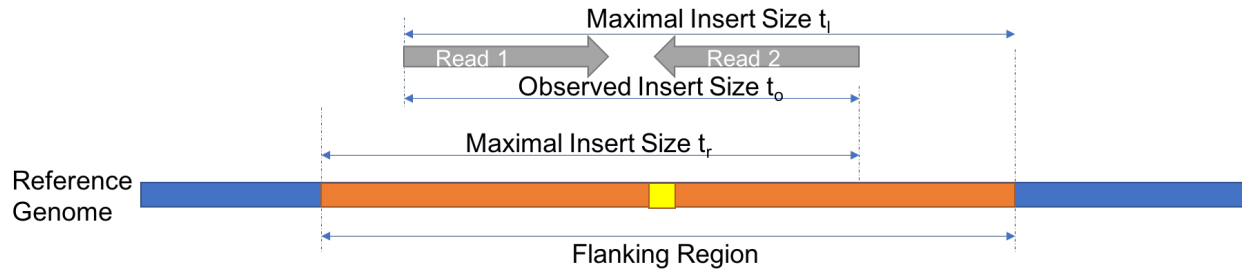

454

455 **Figure S3. Definition of Insert Size Tuple.** The blue portion represents a reference genome backbone. The orange portion  
456 represents the extracted flanking region. The yellow portion represents a variant. The gray bars represent a pair of reads aligning  
457 to this flanking region.

458

459

460

461

462

463

464

465

466

467

468

469

470

471

472

473

474

475

476

477

478

479

480 **Item S1. Detailed Quality Assessment Final Report of HG00553 Whole Genome Dataset (in separate supplementary**  
481 **materials).**

482

483 **Item S2. Detailed Quality Assessment Final Report of HG00553 Exome Dataset (in separate supplementary materials).**

484

485
